# Supplementary material for: Photophysical properties and optical nonlinearity of cyclo[18]carbon (C 18 ) precursors, C 18 –(CO) n ( n = 2, 4, and 6): focusing on the effect of the carbonyl groups
Source: Royal Society of Chemistry journal article supplement (doi:10.1039/d1cp05883e), 2022-01-01
Supplement: d1cp05883e1.pdf [file d1cp05883e1.pdf]

## Supporting Information

### **Photophysical property and optical nonlinearity of cyclo[18]carbon (C<sub>18</sub>) precursors, C<sub>18</sub>-(CO)<sub>n</sub> (n = 2, 4, and 6): Focusing on the effect of carbonyl (-CO) groups**

Xia Wang<sup>a</sup>, Zeyu Liu<sup>\*a</sup>, Xiufen Yan<sup>a</sup>, Tian Lu<sup>\*b</sup>, Haowei Wang<sup>a</sup>, Weiwei Xiong<sup>\*a</sup> and  
Mengdi Zhao<sup>c</sup>

<sup>a</sup>*School of Environmental and Chemical Engineering, Jiangsu University of Science and  
Technology, Zhenjiang 212100, People's Republic of China*

<sup>b</sup>*Beijing Kein Research Center for Natural Sciences, Beijing 100022, People's Republic of  
China*

<sup>c</sup>*Department of Materials Science and Engineering, Suzhou University of Science and Technology,  
Suzhou 215009, People's Republic of China*

---

\*Corresponding author. E-mail: liuzy@just.edu.cn (Zeyu Liu); sobereva@sina.com (Tian Lu);  
xiongweiwei@just.edu.cn (Weiwei Xiong)

Contents:

**Table S1.** Polarizabilities and second hyperpolarizabilities of  $C_{18}-(CO)_n$  ( $n = 2, 4,$  and  $6$ ) in zero-frequency limit ( $\lambda = \infty$  nm) and under frequency-dependent fields ( $\lambda = 1907, 1460, 1340, 1180,$  and  $1064$  nm) calculated at  $\omega B97XD/aug-cc-pVTZ(-f,-d)$  level with default quality grid.....S4

**Table S2.** First hyperpolarizabilities of  $C_{18}-(CO)_n$  ( $n = 2, 4,$  and  $6$ ) in zero-frequency limit ( $\lambda = \infty$  nm) and under frequency-dependent fields ( $\lambda = 1907, 1460, 1340, 1180,$  and  $1064$  nm) calculated at  $\omega B97XD/aug-cc-pVTZ(-f,-d)$  level with default quality grid.....S6

**Table S3.** Polarizabilities and second hyperpolarizabilities of  $C_{18}-(CO)_n$  ( $n = 2, 4,$  and  $6$ ) in zero-frequency limit ( $\lambda = \infty$  nm) and under frequency-dependent fields ( $\lambda = 1907, 1460, 1340, 1180,$  and  $1064$  nm) calculated at  $\omega B97XD/aug-cc-pVTZ(-f,-d)$  level with higher quality grid (using *int=superfine* and *CPHF=grid=fine* keywords) than default.....S7

**Table S4.** First hyperpolarizabilities of  $C_{18}-(CO)_n$  ( $n = 2, 4,$  and  $6$ ) in zero-frequency limit ( $\lambda = \infty$  nm) and under frequency-dependent fields ( $\lambda = 1907, 1460, 1340, 1180,$  and  $1064$  nm) calculated at  $\omega B97XD/aug-cc-pVTZ(-f,-d)$  level with higher quality grid (using *int=superfine* and *CPHF=grid=fine* keywords) than default.....S9

**Table S5.** Polarizabilities and second hyperpolarizabilities of  $C_{18}-(CO)_n$  ( $n = 2, 4,$  and  $6$ ) in zero-frequency limit ( $\lambda = \infty$  nm) and under frequency-dependent fields ( $\lambda = 1907, 1460, 1340, 1180,$  and  $1064$  nm) calculated at CAM-B3LYP/aug-cc-pVTZ(-f,-d) level with higher quality grid (using *int=superfine* and *CPHF=grid=fine* keywords) than default.....S10

**Table S6.** First hyperpolarizabilities of  $C_{18}-(CO)_n$  ( $n = 2, 4,$  and  $6$ ) in zero-frequency limit ( $\lambda = \infty$  nm) and under frequency-dependent fields ( $\lambda = 1907, 1460, 1340, 1180,$  and  $1064$  nm) calculated at CAM-B3LYP/aug-cc-pVTZ(-f,-d) level with higher quality grid (using *int=superfine* and *CPHF=grid=fine* keywords) than default...S12

**Table S7.** Axial tensorial components of the (hyper)polarizabilities of  $C_{18}-(CO)_n$  ( $n = 2, 4,$  and  $6$ ) obtained by FF method in static electric field.....S13

**Figure S1.** Relationship between the polarizabilities and the corresponding electronic spatial extents values of  $C_{18}-(CO)_n$  ( $n = 2, 4,$  and  $6$ ).....S14

|                                                                                                                                                                                                                                                                                                                                                                       |     |
|-----------------------------------------------------------------------------------------------------------------------------------------------------------------------------------------------------------------------------------------------------------------------------------------------------------------------------------------------------------------------|-----|
| <b>Figure S2.</b> Tensorial components of the (hyper)polarizability for $C_{18}-(CO)_n$ ( $n = 2, 4,$ and $6$ ) calculated by coupled-perturbed Kohn-Sham (CPKS) and finite field (FF, with step size of $0.0001$ au) methods. ....                                                                                                                                   | S15 |
| <b>Figure S3.</b> Color-filled contour maps on molecular plane (XY-plane) of the local contribution maps of (hyper)polarizabilities of $C_{18}-(CO)_n$ ( $n = 2, 4,$ and $6$ ) in direction with their largest tensorial component in static electric field .....                                                                                                     | S16 |
| <b>Figure S4.</b> Local contribution maps of (hyper)polarizabilities of $C_{18}-(CO)_n$ ( $n = 2, 4,$ and $6$ ) except the direction with their largest tensorial component on molecular plane in static electric field.....                                                                                                                                          | S17 |
| <b>Figure S5.</b> Local contribution maps of (hyper)polarizabilities of $C_{18}-(CO)_n$ ( $n = 2, 4,$ and $6$ ) along Z-axis direction in static electric field.....                                                                                                                                                                                                  | S18 |
| <b>Table S8.</b> Optimized geometric structure and Cartesian coordinates for <i>trans</i> -4-nitro-4'-aminostilbene ( $C_{14}H_{12}N_2O_2$ ) at $\omega$ B97XD/def2-TZVP level.....                                                                                                                                                                                   | S19 |
| <b>Table S9.</b> Polarizabilities and second hyperpolarizabilities of <i>trans</i> -4-nitro-4'-aminostilbene ( $C_{14}H_{12}N_2O_2$ ) in zero-frequency limit ( $\lambda = \infty$ nm) and under frequency-dependent fields ( $\lambda = 1907, 1460, 1340, 1180,$ and $1064$ nm) calculated at $\omega$ B97XD/aug-cc-pVTZ(-f,-d) level with default quality grid..... | S21 |
| <b>Table S10.</b> First hyperpolarizabilities of <i>trans</i> -4-nitro-4'-aminostilbene ( $C_{14}H_{12}N_2O_2$ ) in zero-frequency limit ( $\lambda = \infty$ nm) and under frequency-dependent fields ( $\lambda = 1907, 1460, 1340, 1180,$ and $1064$ nm) calculated at $\omega$ B97XD/aug-cc-pVTZ(-f,-d) level with default quality grid.....                      | S22 |

**Table S1.** Polarizabilities and second hyperpolarizabilities of  $C_{18}-(CO)_n$  ( $n = 2, 4,$  and  $6$ ) in zero-frequency limit ( $\lambda = \infty$  nm) and under frequency-dependent fields ( $\lambda = 1907, 1460, 1340, 1180,$  and  $1064$  nm) calculated at  $\omega B97XD/aug-cc-pVTZ(-f,-d)$  level with default quality grid

| field frequency<br>( $\lambda$ , in nm) | polarizability (in au)  |                        |                        |                        | second hyperpolarizability (in au) |                         |                         |                         |
|-----------------------------------------|-------------------------|------------------------|------------------------|------------------------|------------------------------------|-------------------------|-------------------------|-------------------------|
|                                         | $\alpha_{iso}(\lambda)$ | $\alpha_{xx}(\lambda)$ | $\alpha_{yy}(\lambda)$ | $\alpha_{zz}(\lambda)$ | $\gamma_{//}(\lambda)$             | $\gamma_{xxx}(\lambda)$ | $\gamma_{yyy}(\lambda)$ | $\gamma_{zzz}(\lambda)$ |
| $\infty$                                | 334.99                  | 561.88                 | 333.69                 | 109.42                 | 211749.30                          | 632254.00               | 148371.00               | 13856.00                |
| 1907                                    | 338.35                  | 568.32                 | 337.12                 | 109.61                 | 243190.10                          | 732984.00               | 168596.00               | 14274.90                |
| 1460                                    | 340.78                  | 572.98                 | 339.62                 | 109.74                 | 271380.90                          | 823193.00               | 186629.00               | 14583.20                |
| 1340                                    | 341.90                  | 575.13                 | 340.78                 | 109.81                 | 286434.40                          | 871185.00               | 196240.00               | 14726.20                |
| 1180                                    | 343.99                  | 579.12                 | 342.94                 | 109.92                 | 319421.90                          | 975416.00               | 217363.00               | 14995.70                |
| 1064                                    | 346.18                  | 583.29                 | 345.21                 | 110.04                 | 364545.20                          | 1113170.00              | 246867.00               | 15282.70                |
| $\infty$                                | 374.83                  | 411.52                 | 591.72                 | 121.23                 | 269172.50                          | 265595.00               | 740194.00               | 13725.40                |
| 1907                                    | 378.89                  | 416.00                 | 599.25                 | 121.43                 | 314102.70                          | 308259.00               | 869272.00               | 14118.20                |
| 1460                                    | 381.86                  | 419.28                 | 604.74                 | 121.57                 | 355095.20                          | 347485.00               | 987204.00               | 14406.60                |
| 1340                                    | 383.23                  | 420.79                 | 607.27                 | 121.64                 | 377163.40                          | 368721.00               | 1050760.00              | 14540.30                |
| 1180                                    | 385.80                  | 423.63                 | 612.02                 | 121.75                 | 425623.60                          | 415579.00               | 1190530.00              | 14791.50                |

|                 |          |        |        |        |        |           |            |            |          |
|-----------------|----------|--------|--------|--------|--------|-----------|------------|------------|----------|
|                 | 1064     | 388.49 | 426.61 | 617.00 | 121.88 | 490946.80 | 478521.00  | 1378470.00 | 15058.20 |
|                 | $\infty$ | 417.16 | 559.19 | 559.18 | 133.12 | 347641.00 | 634862.00  | 634839.00  | 13551.50 |
|                 | 1907     | 422.08 | 566.46 | 566.45 | 133.32 | 412991.60 | 756526.00  | 756500.00  | 13917.70 |
|                 | 1460     | 425.69 | 571.80 | 571.79 | 133.46 | 473740.30 | 869741.00  | 869713.00  | 14185.80 |
| $C_{18}-(CO)_6$ | 1340     | 427.36 | 574.28 | 574.27 | 133.53 | 506759.10 | 931311.00  | 931282.00  | 14309.80 |
|                 | 1180     | 430.50 | 578.93 | 578.92 | 133.65 | 579657.50 | 1067310.00 | 1067280.00 | 14542.20 |
|                 | 1064     | 433.81 | 583.83 | 583.83 | 133.77 | 677074.80 | 1249140.00 | 1249120.00 | 14786.70 |

**Table S2.** First hyperpolarizabilities of  $C_{18}-(CO)_n$  ( $n = 2, 4,$  and  $6$ ) in zero-frequency limit ( $\lambda = \infty$  nm) and under frequency-dependent fields ( $\lambda = 1907, 1460, 1340, 1180,$  and  $1064$  nm) calculated at  $\omega$ B97XD/aug-cc-pVTZ(-f,-d) level with default quality grid

|                 | field frequency<br>( $\lambda$ , in nm) | first hyperpolarizability (in au) |                        |                        |                        |
|-----------------|-----------------------------------------|-----------------------------------|------------------------|------------------------|------------------------|
|                 |                                         | $\beta_{vec}(\lambda)$            | $\beta_{xxx}(\lambda)$ | $\beta_{yyy}(\lambda)$ | $\beta_{zzz}(\lambda)$ |
| $C_{18}-(CO)_2$ | $\infty$                                | 885.31                            | 910.06                 | 0.00                   | 0.00                   |
|                 | 1907                                    | 1177.99                           | 1156.28                | 0.00                   | 0.00                   |
|                 | 1460                                    | 1459.05                           | 1389.12                | 0.00                   | 0.00                   |
|                 | 1340                                    | 1615.67                           | 1517.35                | 0.00                   | 0.00                   |
|                 | 1180                                    | 1972.81                           | 1805.24                | 0.00                   | 0.00                   |
|                 | 1064                                    | 2483.23                           | 2202.73                | 0.00                   | 0.00                   |
|                 | $C_{18}-(CO)_4$                         | $\infty$                          | 939.86                 | 445.54                 | 0.00                   |
| 1907            |                                         | 1231.20                           | 629.12                 | 0.00                   | 0.00                   |
| 1460            |                                         | 1504.40                           | 805.48                 | 0.00                   | 0.00                   |
| 1340            |                                         | 1653.08                           | 903.06                 | 0.00                   | 0.00                   |
| 1180            |                                         | 1980.11                           | 1121.73                | 0.00                   | 0.00                   |
| 1064            |                                         | 2409.57                           | 1418.93                | 0.00                   | 0.00                   |
| $C_{18}-(CO)_6$ |                                         | $\infty$                          | N/A <sup>a</sup>       | 469.86                 | 0.00                   |
|                 | 1907                                    | N/A <sup>a</sup>                  | 523.48                 | 0.00                   | 0.00                   |
|                 | 1460                                    | N/A <sup>a</sup>                  | 568.23                 | 0.00                   | 0.00                   |
|                 | 1340                                    | N/A <sup>a</sup>                  | 590.79                 | 0.00                   | 0.00                   |
|                 | 1180                                    | N/A <sup>a</sup>                  | 636.79                 | 0.00                   | 0.00                   |
|                 | 1064                                    | N/A <sup>a</sup>                  | 691.44                 | 0.00                   | 0.00                   |

<sup>a</sup>Not available, because  $C_{18}-(CO)_6$  has vanished dipole moment.

**Table S3.** Polarizabilities and second hyperpolarizabilities of  $C_{18}-(CO)_n$  ( $n = 2, 4,$  and  $6$ ) in zero-frequency limit ( $\lambda = \infty$  nm) and under frequency-dependent fields ( $\lambda = 1907, 1460, 1340, 1180,$  and  $1064$  nm) calculated at  $\omega B97XD/aug-cc-pVTZ(-f,-d)$  level with higher quality grid (using *int=superfine* and *CPHF=grid=fine* keywords) than default

| field frequency<br>( $\lambda$ , in nm) | polarizability (in au)  |                        |                        |                        | second hyperpolarizability (in au) |                          |                          |                          |
|-----------------------------------------|-------------------------|------------------------|------------------------|------------------------|------------------------------------|--------------------------|--------------------------|--------------------------|
|                                         | $\alpha_{iso}(\lambda)$ | $\alpha_{xx}(\lambda)$ | $\alpha_{yy}(\lambda)$ | $\alpha_{zz}(\lambda)$ | $\gamma_{  }(\lambda)$             | $\gamma_{xxxx}(\lambda)$ | $\gamma_{yyyy}(\lambda)$ | $\gamma_{zzzz}(\lambda)$ |
| $\infty$                                | 334.99                  | 561.88                 | 333.69                 | 109.41                 | 211749.30                          | 632254.00                | 148371.00                | 13856.00                 |
| 1907                                    | 338.35                  | 568.32                 | 337.12                 | 109.61                 | 243189.90                          | 732984.00                | 168597.00                | 14274.90                 |
| 1460                                    | 340.78                  | 572.98                 | 339.62                 | 109.74                 | 271380.20                          | 823192.00                | 186629.00                | 14583.20                 |
| 1340                                    | 341.90                  | 575.12                 | 340.78                 | 109.81                 | 286433.70                          | 871184.00                | 196240.00                | 14726.20                 |
| 1180                                    | 343.99                  | 579.12                 | 342.94                 | 109.92                 | 319420.60                          | 975414.00                | 217363.00                | 14995.70                 |
| 1064                                    | 346.18                  | 583.29                 | 345.21                 | 110.04                 | 364541.90                          | 1113160.00               | 246867.00                | 15282.70                 |
| $\infty$                                | 374.83                  | 411.52                 | 591.72                 | 121.23                 | 269173.60                          | 265592.00                | 740205.00                | 13725.30                 |
| 1907                                    | 378.89                  | 416.00                 | 599.25                 | 121.43                 | 314104.50                          | 308256.00                | 869288.00                | 14118.10                 |
| 1460                                    | 381.86                  | 419.28                 | 604.74                 | 121.57                 | 355098.20                          | 347483.00                | 987225.00                | 14406.50                 |
| 1340                                    | 383.23                  | 420.79                 | 607.28                 | 121.64                 | 377168.10                          | 368719.00                | 1050790.00               | 14540.10                 |

|                                    |          |        |        |        |        |           |            |            |          |
|------------------------------------|----------|--------|--------|--------|--------|-----------|------------|------------|----------|
|                                    | 1180     | 385.80 | 423.63 | 612.02 | 121.75 | 425628.70 | 415578.00  | 1190560.00 | 14791.40 |
|                                    | 1064     | 388.49 | 426.61 | 617.00 | 121.88 | 490956.30 | 478523.00  | 1378520.00 | 15058.00 |
|                                    | $\infty$ | 417.16 | 559.19 | 559.18 | 133.12 | 347639.60 | 634858.00  | 634834.00  | 13551.30 |
|                                    | 1907     | 422.08 | 566.46 | 566.45 | 133.32 | 412988.80 | 756520.00  | 756492.00  | 13917.40 |
| C <sub>18</sub> -(CO) <sub>6</sub> | 1460     | 425.69 | 571.80 | 571.79 | 133.46 | 473736.60 | 869733.00  | 869703.00  | 14185.50 |
|                                    | 1340     | 427.36 | 574.27 | 574.27 | 133.53 | 506754.90 | 931302.00  | 931271.00  | 14309.50 |
|                                    | 1180     | 430.50 | 578.93 | 578.92 | 133.65 | 579649.00 | 1067290.00 | 1067260.00 | 14541.90 |
|                                    | 1064     | 433.81 | 583.83 | 583.83 | 133.77 | 677066.10 | 1249120.00 | 1249100.00 | 14786.50 |



**Table S4.** First hyperpolarizabilities of  $C_{18}-(CO)_n$  ( $n = 2, 4,$  and  $6$ ) in zero-frequency limit ( $\lambda = \infty$  nm) and under frequency-dependent fields ( $\lambda = 1907, 1460, 1340, 1180,$  and  $1064$  nm) calculated at  $\omega B97XD/$ aug-cc-pVTZ(-f,-d) level with higher quality grid (using *int=superfine* and *CPHF=grid=fine* keywords) than default

|                 | field frequency<br>( $\lambda$ , in nm) | first hyperpolarizability (in au) |                        |                        |                        |
|-----------------|-----------------------------------------|-----------------------------------|------------------------|------------------------|------------------------|
|                 |                                         | $\beta_{vec}(\lambda)$            | $\beta_{xxx}(\lambda)$ | $\beta_{yyy}(\lambda)$ | $\beta_{zzz}(\lambda)$ |
| $C_{18}-(CO)_2$ | $\infty$                                | 885.26                            | 910.01                 | 0.00                   | 0.00                   |
|                 | 1907                                    | 1177.93                           | 1156.23                | 0.00                   | 0.00                   |
|                 | 1460                                    | 1458.97                           | 1389.06                | 0.00                   | 0.00                   |
|                 | 1340                                    | 1615.59                           | 1517.28                | 0.00                   | 0.00                   |
|                 | 1180                                    | 1972.71                           | 1805.16                | 0.00                   | 0.00                   |
|                 | 1064                                    | 2483.11                           | 2202.63                | 0.00                   | 0.00                   |
| $C_{18}-(CO)_4$ | $\infty$                                | 939.99                            | 445.63                 | 0.00                   | 0.00                   |
|                 | 1907                                    | 1231.36                           | 629.22                 | 0.00                   | 0.00                   |
|                 | 1460                                    | 1504.59                           | 805.61                 | 0.00                   | 0.00                   |
|                 | 1340                                    | 1653.29                           | 903.20                 | 0.00                   | 0.00                   |
|                 | 1180                                    | 1980.35                           | 1121.88                | 0.00                   | 0.00                   |
|                 | 1064                                    | 2409.86                           | 1419.12                | 0.00                   | 0.00                   |
| $C_{18}-(CO)_6$ | $\infty$                                | N/A <sup>a</sup>                  | 469.80                 | 0.00                   | 0.00                   |
|                 | 1907                                    | N/A <sup>a</sup>                  | 523.41                 | 0.00                   | 0.00                   |
|                 | 1460                                    | N/A <sup>a</sup>                  | 568.15                 | 0.00                   | 0.00                   |
|                 | 1340                                    | N/A <sup>a</sup>                  | 590.70                 | 0.00                   | 0.00                   |
|                 | 1180                                    | N/A <sup>a</sup>                  | 636.70                 | 0.00                   | 0.00                   |
|                 | 1064                                    | N/A <sup>a</sup>                  | 691.33                 | 0.00                   | 0.00                   |

<sup>a</sup>Not available, because  $C_{18}-(CO)_6$  has vanished dipole moment.

**Table S5.** Polarizabilities and second hyperpolarizabilities of  $C_{18}-(CO)_n$  ( $n = 2, 4,$  and  $6$ ) in zero-frequency limit ( $\lambda = \infty$  nm) and under frequency-dependent fields ( $\lambda = 1907, 1460, 1340, 1180,$  and  $1064$  nm) calculated at CAM-B3LYP/aug-cc-pVTZ(-f,-d) level with higher quality grid (using *int=superfine* and *CPHF=grid=fine* keywords) than default

| field frequency<br>( $\lambda$ , in nm) | polarizability (in au)  |                        |                        |                        | second hyperpolarizability (in au) |                          |                          |                          |          |
|-----------------------------------------|-------------------------|------------------------|------------------------|------------------------|------------------------------------|--------------------------|--------------------------|--------------------------|----------|
|                                         | $\alpha_{iso}(\lambda)$ | $\alpha_{xx}(\lambda)$ | $\alpha_{yy}(\lambda)$ | $\alpha_{zz}(\lambda)$ | $\gamma_{  }(\lambda)$             | $\gamma_{xxxx}(\lambda)$ | $\gamma_{yyyy}(\lambda)$ | $\gamma_{zzzz}(\lambda)$ |          |
| $C_{18}-(CO)_2$                         | $\infty$                | 336.17                 | 565.14                 | 334.43                 | 108.93                             | 220260.90                | 673118.00                | 149033.00                | 12626.90 |
|                                         | 1907                    | 339.61                 | 571.78                 | 337.94                 | 109.12                             | 255737.50                | 789907.00                | 170644.00                | 13019.00 |
|                                         | 1460                    | 342.12                 | 576.59                 | 340.50                 | 109.26                             | 288183.50                | 896923.00                | 190161.00                | 13308.00 |
|                                         | 1340                    | 343.27                 | 578.81                 | 341.68                 | 109.32                             | 305766.90                | 954864.00                | 200659.00                | 13442.30 |
|                                         | 1180                    | 345.42                 | 582.94                 | 343.89                 | 109.43                             | 344951.80                | 1083330.00               | 223969.00                | 13695.60 |
|                                         | 1064                    | 347.67                 | 578.25                 | 346.21                 | 109.55                             | 399971.40                | 1259200.00               | 257099.00                | 13966.30 |
| $C_{18}-(CO)_4$                         | $\infty$                | 376.19                 | 412.73                 | 595.16                 | 120.69                             | 283410.00                | 271930.00                | 788982.00                | 12478.70 |
|                                         | 1907                    | 380.39                 | 417.33                 | 602.94                 | 120.89                             | 334579.20                | 318593.00                | 937611.00                | 12842.80 |
|                                         | 1460                    | 383.45                 | 420.70                 | 608.63                 | 121.03                             | 382243.10                | 362373.00                | 1076190.00               | 13110.40 |
|                                         | 1340                    | 384.87                 | 422.25                 | 611.26                 | 121.09                             | 408306.70                | 386454.00                | 1151990.00               | 13234.50 |

|                 |          |        |        |        |        |           |            |            |          |
|-----------------|----------|--------|--------|--------|--------|-----------|------------|------------|----------|
|                 | 1180     | 387.52 | 425.17 | 616.18 | 121.21 | 466572.90 | 440607.00  | 1321460.00 | 13468.00 |
|                 | 1064     | 390.31 | 428.24 | 621.35 | 121.33 | 547269.40 | 515746.00  | 1555240.00 | 13715.90 |
|                 | $\infty$ | 418.83 | 562.00 | 562.00 | 132.50 | 370142.70 | 678033.00  | 678069.00  | 12259.40 |
|                 | 1907     | 423.92 | 569.53 | 569.53 | 132.70 | 445218.10 | 817928.00  | 817975.00  | 12594.50 |
|                 | 1460     | 427.66 | 575.07 | 575.07 | 132.84 | 516504.00 | 950892.00  | 950950.00  | 12840.10 |
| $C_{18}-(CO)_6$ | 1340     | 429.40 | 577.65 | 577.65 | 132.91 | 555865.30 | 1024350.00 | 1024410.00 | 12953.80 |
|                 | 1180     | 432.66 | 582.48 | 582.48 | 133.03 | 644321.90 | 1189500.00 | 1189580.00 | 13167.00 |
|                 | 1064     | 436.11 | 587.59 | 587.59 | 133.15 | 765956.90 | 1416710.00 | 1416820.00 | 13391.40 |

**Table S6.** First hyperpolarizabilities of  $C_{18}-(CO)_n$  ( $n = 2, 4,$  and  $6$ ) in zero-frequency limit ( $\lambda = \infty$  nm) and under frequency-dependent fields ( $\lambda = 1907, 1460, 1340, 1180,$  and  $1064$  nm) calculated at CAM-B3LYP/aug-cc-pVTZ(-f,-d) level with higher quality grid (using *int=superfine* and *CPHF=grid=fine* keywords) than default

|                 | field frequency      | first hyperpolarizability (in au) |                        |                        |                        |
|-----------------|----------------------|-----------------------------------|------------------------|------------------------|------------------------|
|                 | ( $\lambda$ , in nm) | $\beta_{vec}(\lambda)$            | $\beta_{xxx}(\lambda)$ | $\beta_{yyy}(\lambda)$ | $\beta_{zzz}(\lambda)$ |
| $C_{18}-(CO)_2$ | $\infty$             | 1023.85                           | 1037.76                | 0.00                   | 0.00                   |
|                 | 1907                 | 1359.33                           | 1323.68                | 0.00                   | 0.00                   |
|                 | 1460                 | 1686.67                           | 1599.22                | 0.00                   | 0.00                   |
|                 | 1340                 | 1871.28                           | 1753.18                | 0.00                   | 0.00                   |
|                 | 1180                 | 2297.98                           | 2104.76                | 0.00                   | 0.00                   |
|                 | 1064                 | 2920.64                           | 2603.99                | 0.00                   | 0.00                   |
|                 | $C_{18}-(CO)_4$      | $\infty$                          | 1077.67                | 496.81                 | 0.00                   |
| 1907            |                      | 1408.60                           | 698.29                 | 0.00                   | 0.00                   |
| 1460            |                      | 1724.03                           | 894.79                 | 0.00                   | 0.00                   |
| 1340            |                      | 1897.96                           | 1004.79                | 0.00                   | 0.00                   |
| 1180            |                      | 2286.66                           | 1254.62                | 0.00                   | 0.00                   |
| 1064            |                      | 2811.87                           | 1601.85                | 0.00                   | 0.00                   |
| $C_{18}-(CO)_6$ |                      | $\infty$                          | N/A <sup>a</sup>       | 540.18                 | 0.00                   |
|                 | 1907                 | N/A <sup>a</sup>                  | 608.96                 | 0.00                   | 0.00                   |
|                 | 1460                 | N/A <sup>a</sup>                  | 667.70                 | 0.00                   | 0.00                   |
|                 | 1340                 | N/A <sup>a</sup>                  | 697.80                 | 0.00                   | 0.00                   |
|                 | 1180                 | N/A <sup>a</sup>                  | 760.26                 | 0.00                   | 0.00                   |
|                 | 1064                 | N/A <sup>a</sup>                  | 836.47                 | 0.00                   | 0.00                   |

<sup>a</sup>Not available, because  $C_{18}-(CO)_6$  has vanished dipole moment.

**Table S7.** Axial tensorial components of the (hyper)polarizabilities of C<sub>18</sub>-(CO)<sub>*n*</sub> (*n* = 2, 4, and 6) obtained by FF method in static electric field

|                                    | polarizability (in au)        |                               |                               | first hyperpolarizability (in au) |                               |                               | second hyperpolarizability (in au) |                                |                                |
|------------------------------------|-------------------------------|-------------------------------|-------------------------------|-----------------------------------|-------------------------------|-------------------------------|------------------------------------|--------------------------------|--------------------------------|
|                                    | $\alpha_{xx}(\lambda=\infty)$ | $\alpha_{yy}(\lambda=\infty)$ | $\alpha_{zz}(\lambda=\infty)$ | $\beta_{xxx}(\lambda=\infty)$     | $\beta_{yyy}(\lambda=\infty)$ | $\beta_{zzz}(\lambda=\infty)$ | $\gamma_{xxx}(\lambda=\infty)$     | $\gamma_{yyy}(\lambda=\infty)$ | $\gamma_{zzz}(\lambda=\infty)$ |
| -C <sub>18</sub>                   | 370.42                        | 297.43                        | 93.29                         | -420.90                           | 1.04                          | 0.35                          | 379896.20                          | 149597.40                      | 12446.14                       |
| C <sub>18</sub> -(CO) <sub>2</sub> | -                             | -                             | -                             | -                                 | -                             | -                             | -                                  | -                              | -                              |
| -(CO) <sub><i>n</i></sub>          | 191.97                        | 36.26                         | 16.08                         | 1336.44                           | -0.02                         | 0.03                          | 252796.30                          | -1280.00                       | 1087.29                        |
| total                              | 562.39                        | 333.69                        | 109.37                        | 915.54                            | 1.02                          | 0.38                          | 632692.50                          | 148317.40                      | 13533.43                       |
| -C <sub>18</sub>                   | 279.78                        | 247.53                        | 89.25                         | -51.27                            | -0.09                         | 0.31                          | 204489.50                          | 320261.60                      | 11296.16                       |
| C <sub>18</sub> -(CO) <sub>4</sub> | -                             | -                             | -                             | -                                 | -                             | -                             | -                                  | -                              | -                              |
| -(CO) <sub><i>n</i></sub>          | 131.71                        | 345.03                        | 31.94                         | 502.25                            | 0.79                          | 0.06                          | 60091.06                           | 421705.30                      | 2124.12                        |
| total                              | 411.49                        | 592.56                        | 121.19                        | 450.99                            | 0.70                          | 0.37                          | 264580.50                          | 741967.00                      | 13420.28                       |
| -C <sub>18</sub>                   | 174.95                        | 175.07                        | 85.41                         | -621.41                           | -0.61                         | 0.25                          | 239010.50                          | 238158.50                      | 9597.75                        |
| C <sub>18</sub> -(CO) <sub>6</sub> | -                             | -                             | -                             | -                                 | -                             | -                             | -                                  | -                              | -                              |
| -(CO) <sub><i>n</i></sub>          | 385.33                        | 385.50                        | 47.67                         | 1085.08                           | -1.29                         | 0.09                          | 396974.20                          | 397856.40                      | 2817.42                        |
| total                              | 560.28                        | 560.57                        | 133.08                        | 463.68                            | -1.90                         | 0.35                          | 635984.70                          | 636014.90                      | 12415.17                       |

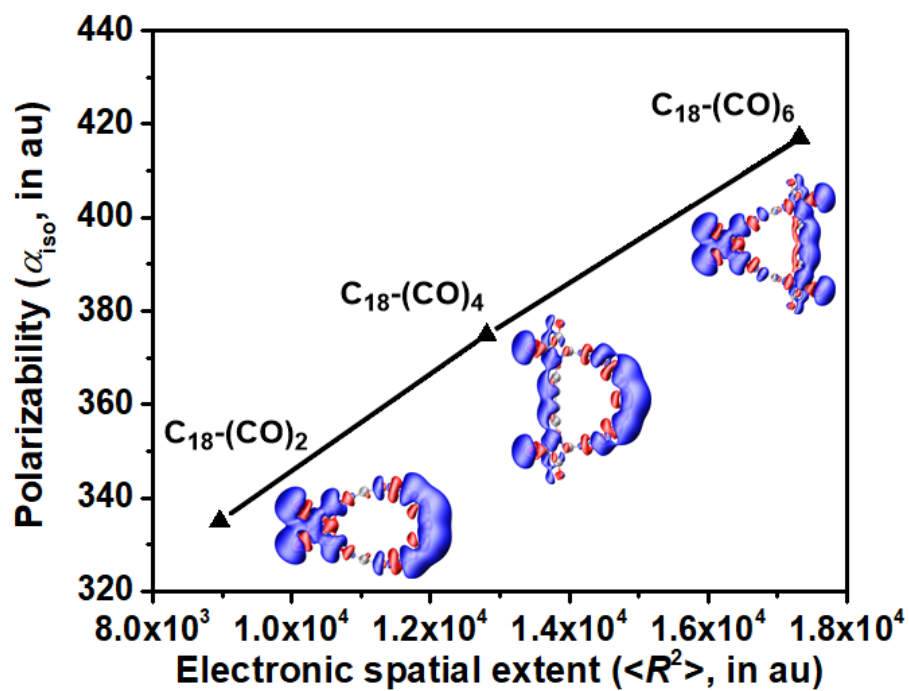

**Figure S1.** Relationship between the polarizabilities and the corresponding electronic spatial extents values of  $C_{18}-(CO)_n$  ( $n = 2, 4,$  and  $6$ ).

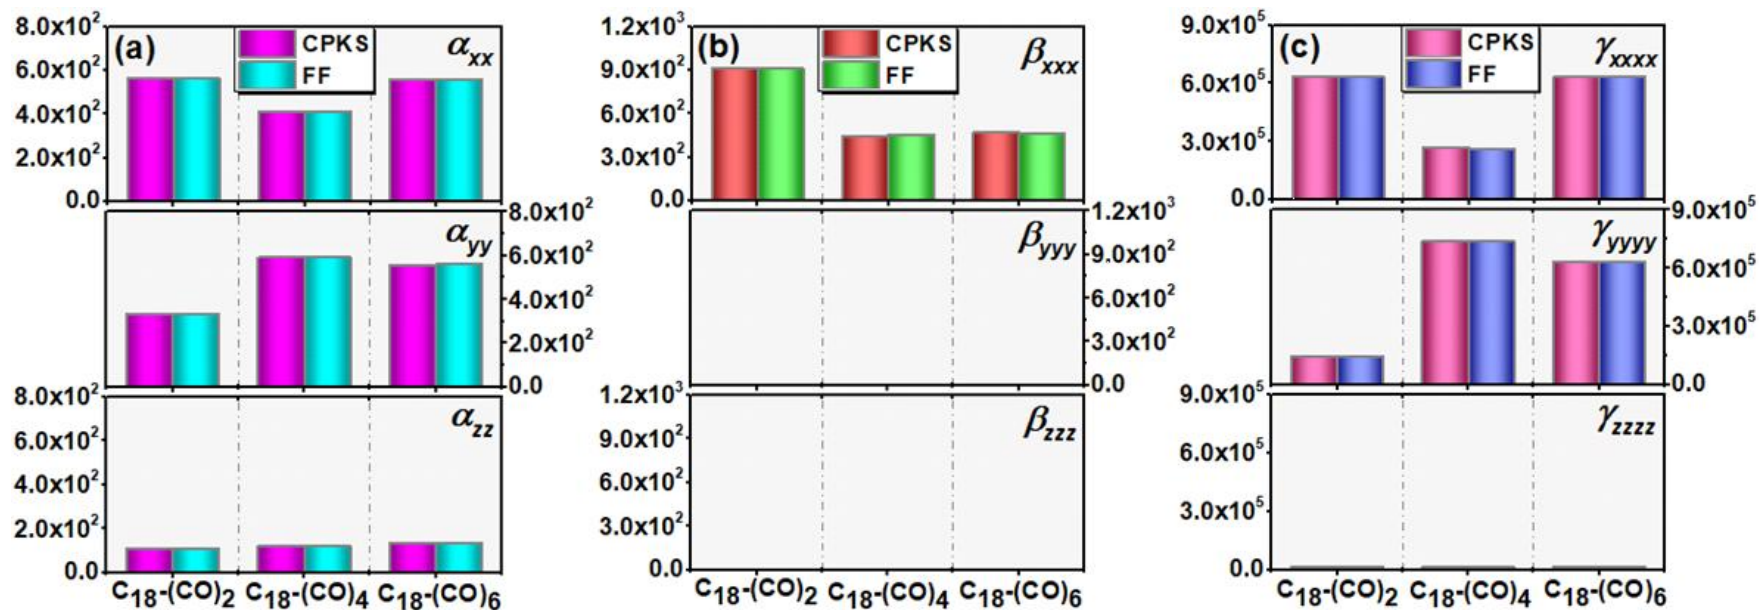

**Figure S2.** Tensorial components of the (hyper)polarizability for  $C_{18}-(CO)_n$  ( $n = 2, 4, \text{ and } 6$ ) calculated by coupled-perturbed Kohn-Sham (CPKS) and finite field (FF, with step size of 0.0001 au) methods. The values of (hyper)polarizabilities are given in au.

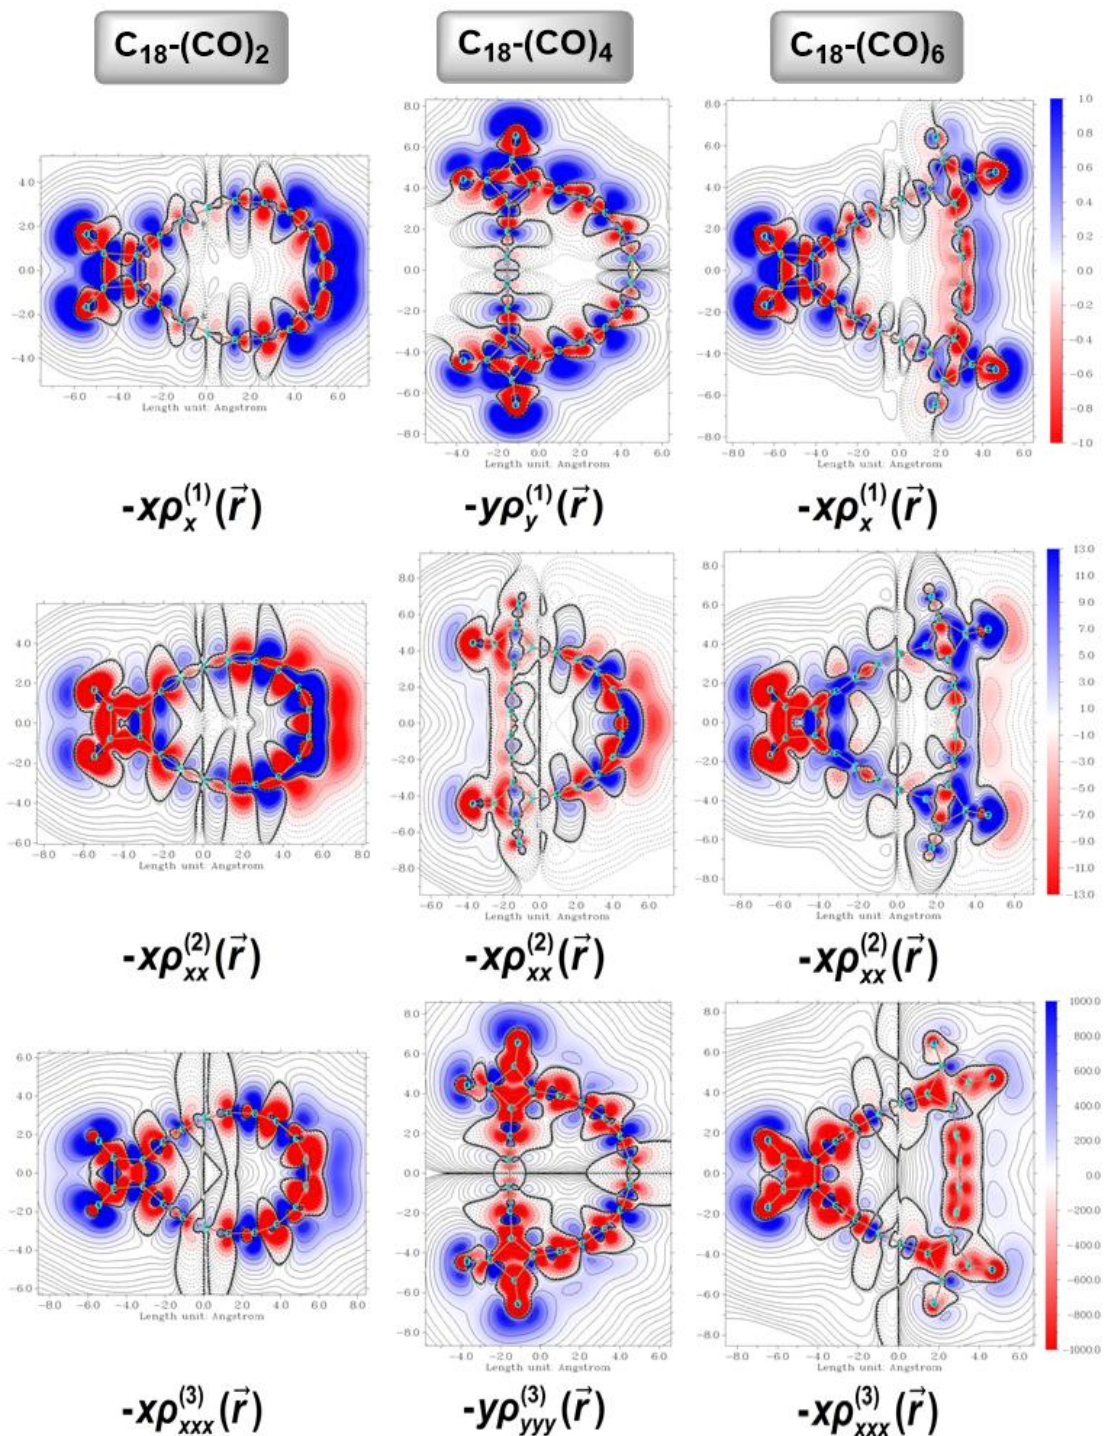

**Figure S3.** Color-filled contour maps on molecular plane (XY-plane) of the local contribution maps of (hyper)polarizabilities of C<sub>18</sub>-(CO)<sub>n</sub> (*n* = 2, 4, and 6) in direction with their largest tensorial component in static electric field.



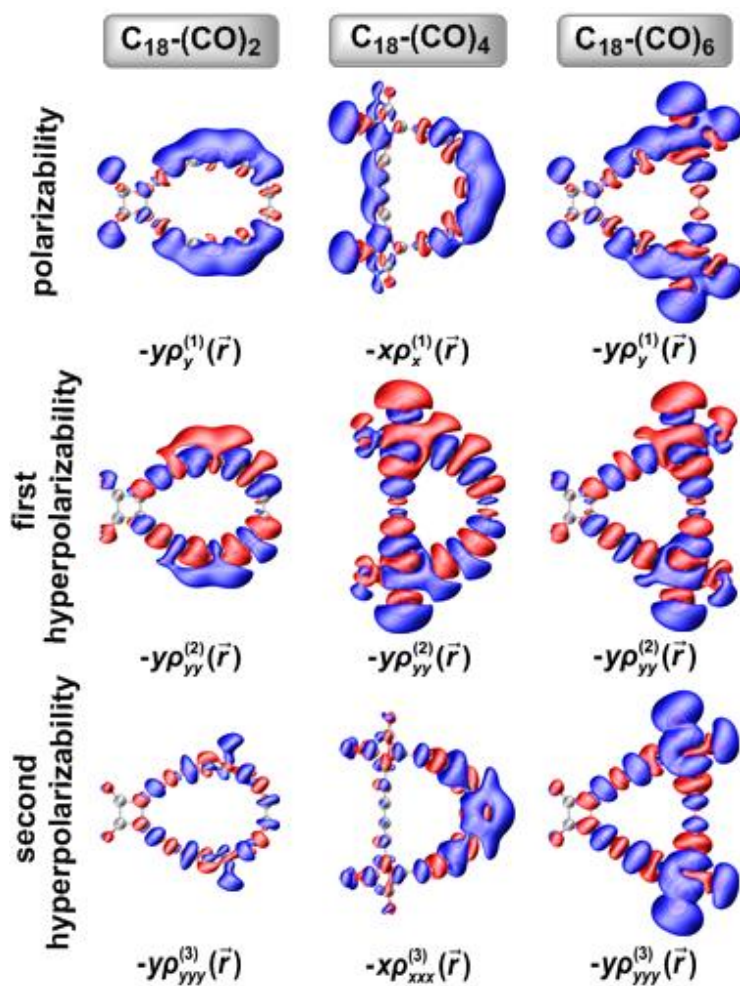

**Figure S4.** Local contribution maps of (hyper)polarizabilities of  $C_{18}-(CO)_n$  ( $n = 2, 4,$  and  $6$ ) except the direction with their largest tensorial component on the molecular plane in static electric field. Blue and red isosurfaces represent positive and negative electron contributions, respectively. The isovalues of polarizabilities, first hyperpolarizabilities, and second hyperpolarizabilities are set to be 0.2, 2.5, and 200.0 au, respectively.

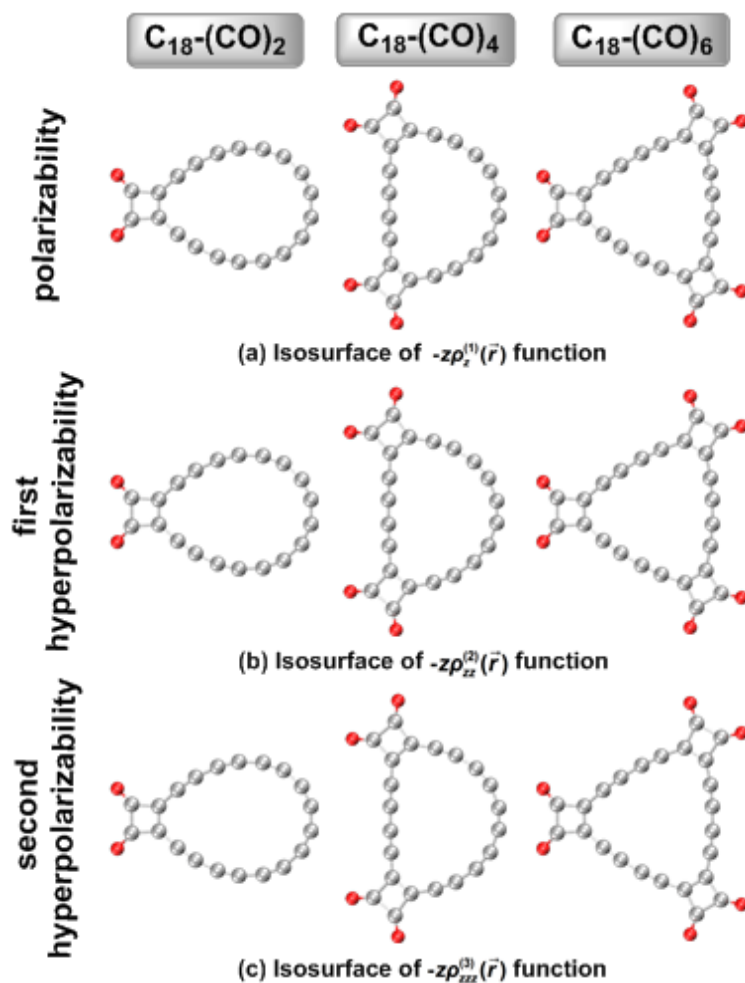

**Figure S5.** Local contribution maps of (hyper)polarizabilities of  $C_{18}-(CO)_n$  ( $n = 2, 4,$  and  $6$ ) along Z-axis direction in static electric field. Blue and red isosurfaces represent positive and negative electron contributions, respectively. The isovalues of polarizabilities, first hyperpolarizabilities, and second hyperpolarizabilities are set to be 0.2, 2.5, and 200.0 au, respectively.

**Table S8.** Optimized geometric structure and Cartesian coordinates for *trans*-4-nitro-4'-aminostilbene (C<sub>14</sub>H<sub>12</sub>N<sub>2</sub>O<sub>2</sub>) at ωB97XD/def2-TZVP level. The values are given in Å

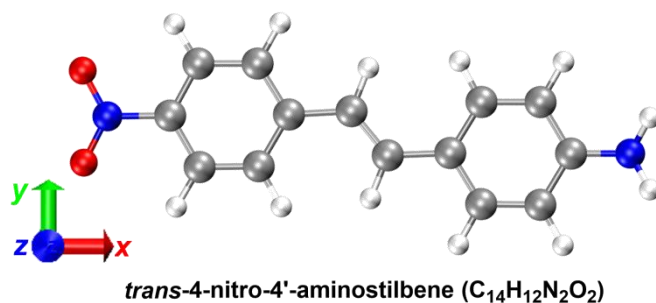

| charge = 0, spin multiplicity = 1 |             |             |             |
|-----------------------------------|-------------|-------------|-------------|
| atom                              | <i>x</i>    | <i>y</i>    | <i>z</i>    |
| C                                 | 1.21697331  | -0.42274085 | -0.00261185 |
| C                                 | 0.27169576  | 0.52163394  | -0.00337193 |
| C                                 | -1.17431787 | 0.30071852  | -0.00202494 |
| C                                 | -2.02176918 | 1.41293613  | -0.00203153 |
| C                                 | -1.76219318 | -0.96990915 | -0.00062853 |
| C                                 | -3.39621998 | 1.27658280  | -0.00044583 |
| H                                 | -1.58982652 | 2.40613252  | -0.00335878 |
| C                                 | -3.13216306 | -1.12372396 | 0.00096541  |
| H                                 | -1.14377119 | -1.85703345 | -0.00090190 |
| C                                 | -3.93656561 | 0.00433457  | 0.00114034  |
| H                                 | -4.04896257 | 2.13705611  | -0.00044535 |
| H                                 | -3.58772346 | -2.10308391 | 0.00202469  |
| C                                 | 2.66334126  | -0.22612363 | -0.00370715 |
| C                                 | 3.50121408  | -1.34196375 | -0.00425249 |
| C                                 | 3.27631859  | 1.03029147  | -0.00346940 |
| C                                 | 4.87681825  | -1.22315757 | -0.00432648 |
| H                                 | 3.06082491  | -2.33269393 | -0.00398502 |
| C                                 | 4.64714525  | 1.16310226  | -0.00395777 |
| H                                 | 2.67286594  | 1.92913783  | -0.00248673 |
| C                                 | 5.47653526  | 0.03625182  | -0.00295375 |
| H                                 | 5.49599173  | -2.11254845 | -0.00888214 |
| H                                 | 5.09162106  | 2.15164683  | -0.00854657 |
| N                                 | -5.39411886 | -0.15595596 | 0.00307888  |
| N                                 | 6.85097701  | 0.17128956  | -0.05248352 |
| H                                 | 7.39017179  | -0.62119360 | 0.24905142  |
| H                                 | 7.22630285  | 1.05078142  | 0.25621163  |

---

|   |             |             |             |
|---|-------------|-------------|-------------|
| O | -6.07294527 | 0.84963080  | 0.00332374  |
| O | -5.83771228 | -1.28533369 | 0.00464890  |
| H | 0.91233514  | -1.46523356 | -0.00123923 |
| H | 0.56654684  | 1.56592456  | -0.00533536 |

---

**Table S9.** Polarizabilities and second hyperpolarizabilities of *trans*-4-nitro-4'-aminostilbene (C<sub>14</sub>H<sub>12</sub>N<sub>2</sub>O<sub>2</sub>) in zero-frequency limit ( $\lambda = \infty$  nm) and under frequency-dependent fields ( $\lambda = 1907, 1460, 1340, 1180,$  and  $1064$  nm) calculated at  $\omega$ B97XD/aug-cc-pVTZ(-f,-d) level with default quality grid

| field frequency<br>( $\lambda$ , in nm) | polarizability (in au)         |                               |                               |                               | second hyperpolarizability (in au) |                                 |                                 |                                 |
|-----------------------------------------|--------------------------------|-------------------------------|-------------------------------|-------------------------------|------------------------------------|---------------------------------|---------------------------------|---------------------------------|
|                                         | $\alpha_{\text{iso}}(\lambda)$ | $\alpha_{\text{xx}}(\lambda)$ | $\alpha_{\text{yy}}(\lambda)$ | $\alpha_{\text{zz}}(\lambda)$ | $\gamma_{  }(\lambda)$             | $\gamma_{\text{xxxx}}(\lambda)$ | $\gamma_{\text{yyyy}}(\lambda)$ | $\gamma_{\text{zzzz}}(\lambda)$ |
| $\infty$                                | 235.48                         | 418.88                        | 184.77                        | 102.80                        | 378977.30                          | 1818210.00                      | 22075.40                        | 19467.40                        |
| 1907                                    | 238.21                         | 426.18                        | 185.45                        | 103.00                        | 481037.20                          | 2327330.00                      | 23047.90                        | 20262.30                        |
| 1460                                    | 240.22                         | 431.60                        | 185.93                        | 103.14                        | 580959.80                          | 2826630.00                      | 23791.30                        | 20855.60                        |
| 1340                                    | 241.16                         | 434.13                        | 186.15                        | 103.20                        | 636980.30                          | 3106810.00                      | 24145.10                        | 21133.20                        |
| 1180                                    | 242.93                         | 438.90                        | 186.56                        | 103.32                        | 764196.70                          | 3743550.00                      | 24827.60                        | 21659.20                        |
| 1064                                    | 244.80                         | 443.97                        | 186.98                        | 103.44                        | 940304.10                          | 4625770.00                      | 25576.10                        | 22220.50                        |

**Table S10.** First hyperpolarizabilities of *trans*-4-nitro-4'-aminostilbene (C<sub>14</sub>H<sub>12</sub>N<sub>2</sub>O<sub>2</sub>) in zero-frequency limit ( $\lambda = \infty$  nm) and under frequency-dependent fields ( $\lambda = 1907$ , 1460, 1340, 1180, and 1064 nm) calculated at  $\omega$ B97XD/aug-cc-pVTZ(-f,-d) level with default quality grid

| field frequency<br>( $\lambda$ , in nm) | first hyperpolarizability (in au) |                               |                               |                               |
|-----------------------------------------|-----------------------------------|-------------------------------|-------------------------------|-------------------------------|
|                                         | $\beta_{\text{vec}}(\lambda)$     | $\beta_{\text{xxx}}(\lambda)$ | $\beta_{\text{yyy}}(\lambda)$ | $\beta_{\text{zzz}}(\lambda)$ |
| $\infty$                                | 8459.58                           | 8778.72                       | -3.03                         | -3.24                         |
| 1907                                    | 10369.87                          | 10723.60                      | -1.39                         | -3.48                         |
| 1460                                    | 12141.45                          | 12525.40                      | 0.02                          | -3.66                         |
| 1340                                    | 13098.49                          | 13498.20                      | 0.73                          | -3.75                         |
| 1180                                    | 15189.08                          | 15622.10                      | 2.20                          | -3.92                         |
| 1064                                    | 17922.63                          | 18397.40                      | 3.94                          | -4.10                         |
